# Supplementary material for: Amino-functionalized MIL-125(Ti) for photodenitrification of pyridine in fuels via coordination activation by unsaturated Ti4+ centers
Source: Royal Society of Chemistry journal article supplement (doi:10.1039/d2dt03916h), 2023-01-01
Supplement: d2dt03916h1.pdf [file d2dt03916h1.pdf]

## Supporting Information

### **Amino-functionalized MIL-125(Ti) for photo- denitrification of pyridine in fuel via the coordination activation by unsaturated Ti<sup>4+</sup> centers**

**Shihui Wang<sup>a,b,c</sup>, Zhoujun He<sup>a,b</sup>, Ling Wu<sup>c</sup>, Deling Wang<sup>a,b,c</sup>, Ruiru Si<sup>d</sup>, Xiyao Liu<sup>b,\*</sup> and  
Ruowen Liang<sup>a,b,c\*</sup>**

<sup>a</sup> Province University Key Laboratory of Green Energy and Environment Catalysis, Ningde Normal University, Ningde 352100, P. R. China

<sup>b</sup> Fujian Provincial Key Laboratory of Featured Materials in Biochemical Industry, Ningde Normal University, Ningde 352100, P. R. China

<sup>c</sup> State Key Laboratory of Photocatalysis on Energy and Environment, Fuzhou University, Fuzhou 350002, P. R. China

<sup>d</sup> Fujian Key Laboratory of Agro-products Quality and Safety, Fujian Academy of Agricultural Sciences, Fuzhou 350003, PR China

\* Corresponding author: Prof. Ruowen Liang

Tel: +86-591-83779362; E-mail: t1629@ndnu.edu.cn

\* Corresponding author: Prof. Xiyao Liu

Tel: +86-13799276079; E-mail: t1930@ndnu.edu.cn

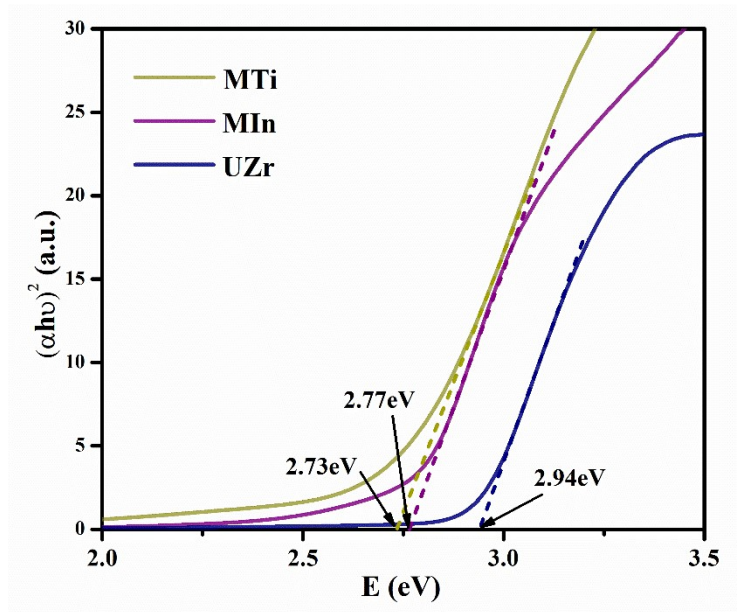

**Fig. S1.** Tauc plot of MTi.

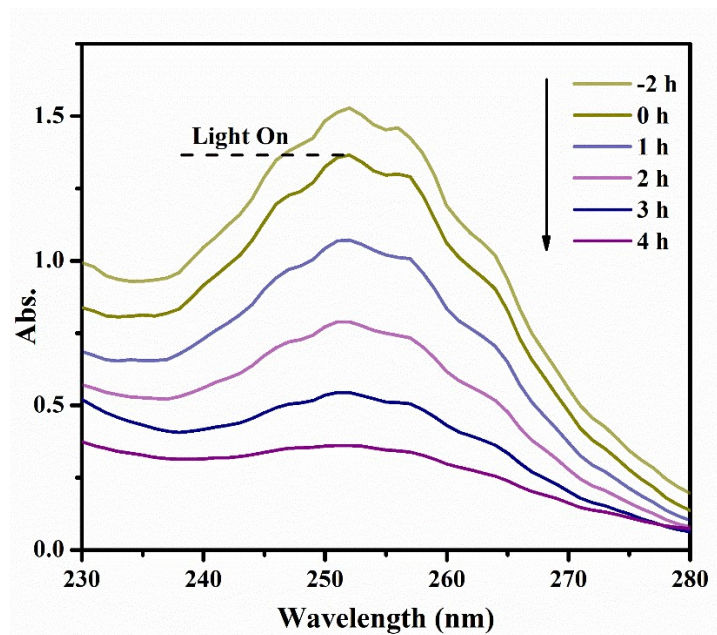

**Fig. S2.** (b) Time-dependent absorption curves of pyridine/octane solutions over MTi.

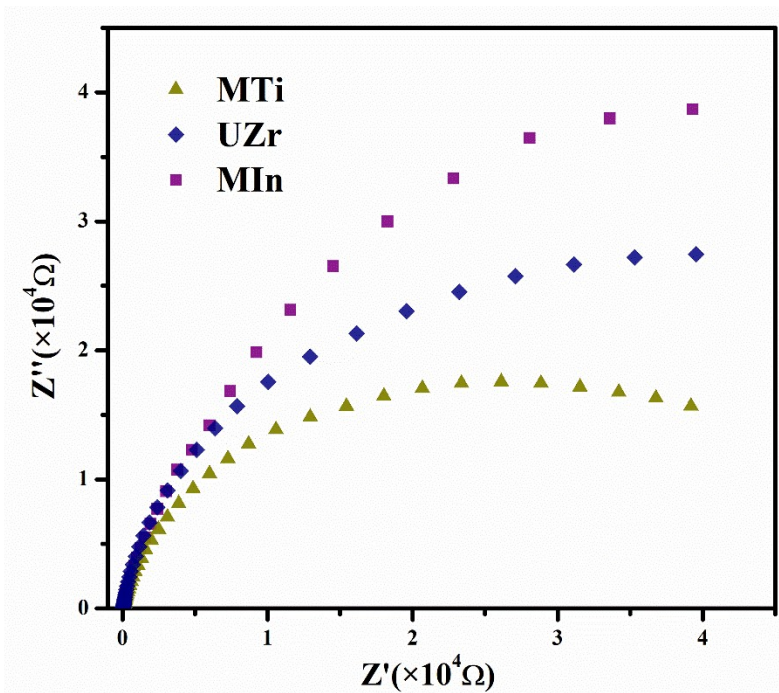

Fig. S3. EIS spectra of as-prepared catalysts.

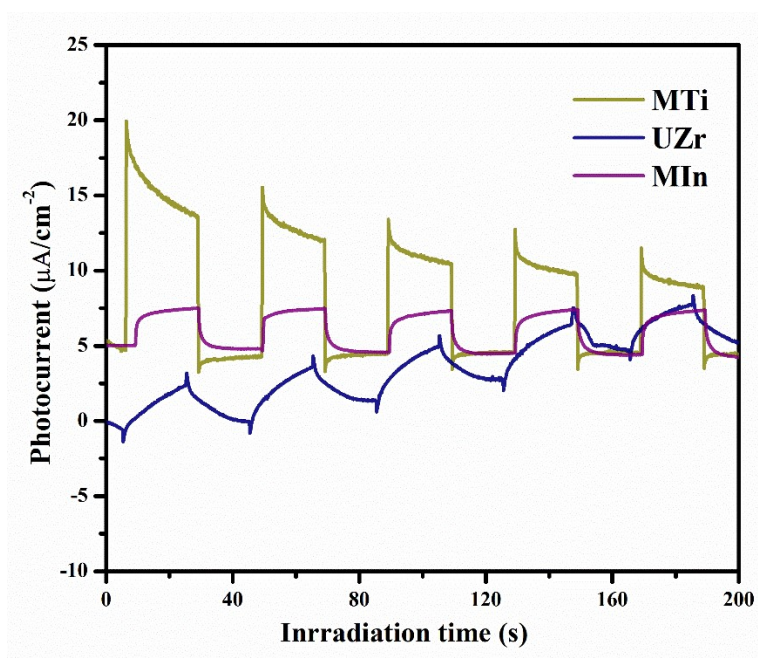

Fig. S4. Transient photocurrent response of as-prepared catalysts.

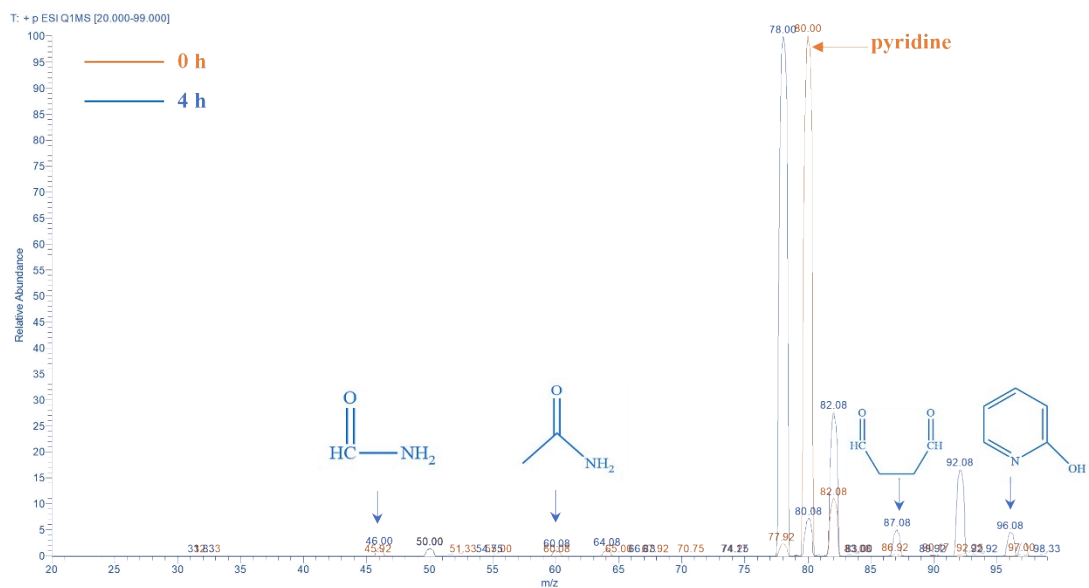

**Fig. S5.** HPLC-MS spectrogram of denitrification over MTi at different reaction times.
